# Supplementary material for: Experience of enhanced near-peer support for new medical graduates of an Irish university: a phenomenological study
Source: HighWire-hosted journal article supplement (doi:10.1136/bmjopen-2022-069101), 2023-05-01
Supplement: bmjopen-2022-069101supp001_data_supplement.pdf [file bmjopen-2022-069101supp001_data_supplement.pdf]

## Interview Schedule

What was your initial experience of commencing work?

How did your experience evolve over time?

What challenges did you face?

What was your relationship with the 'senior interns'?

Did you feel supported in the workplace?

What was your experience of seeking support?

What was your experience of the support provided by the 'senior interns'?

What did you do/What did they do?

How did this evolve over time?

What was your experience of working at the end of the overlap when the 'senior interns' changed over to new roles?

How do you feel now about the overlap period?

How do you feel your experience would have been different if you had commenced work in 'normal circumstances', prior to the pandemic?
